# Supplementary material for: Insights into the phylogeny and chloroplast genome evolution of Eriocaulon (Eriocaulaceae)
Source: PubMed Central journal article supplement (PMC9840334; doi:10.1186/s12870-023-04034-z), 2023-01-14
Supplement: 12870_2023_4034_MOESM2_ESM.pdf [file 12870_2023_4034_MOESM2_ESM.pdf]

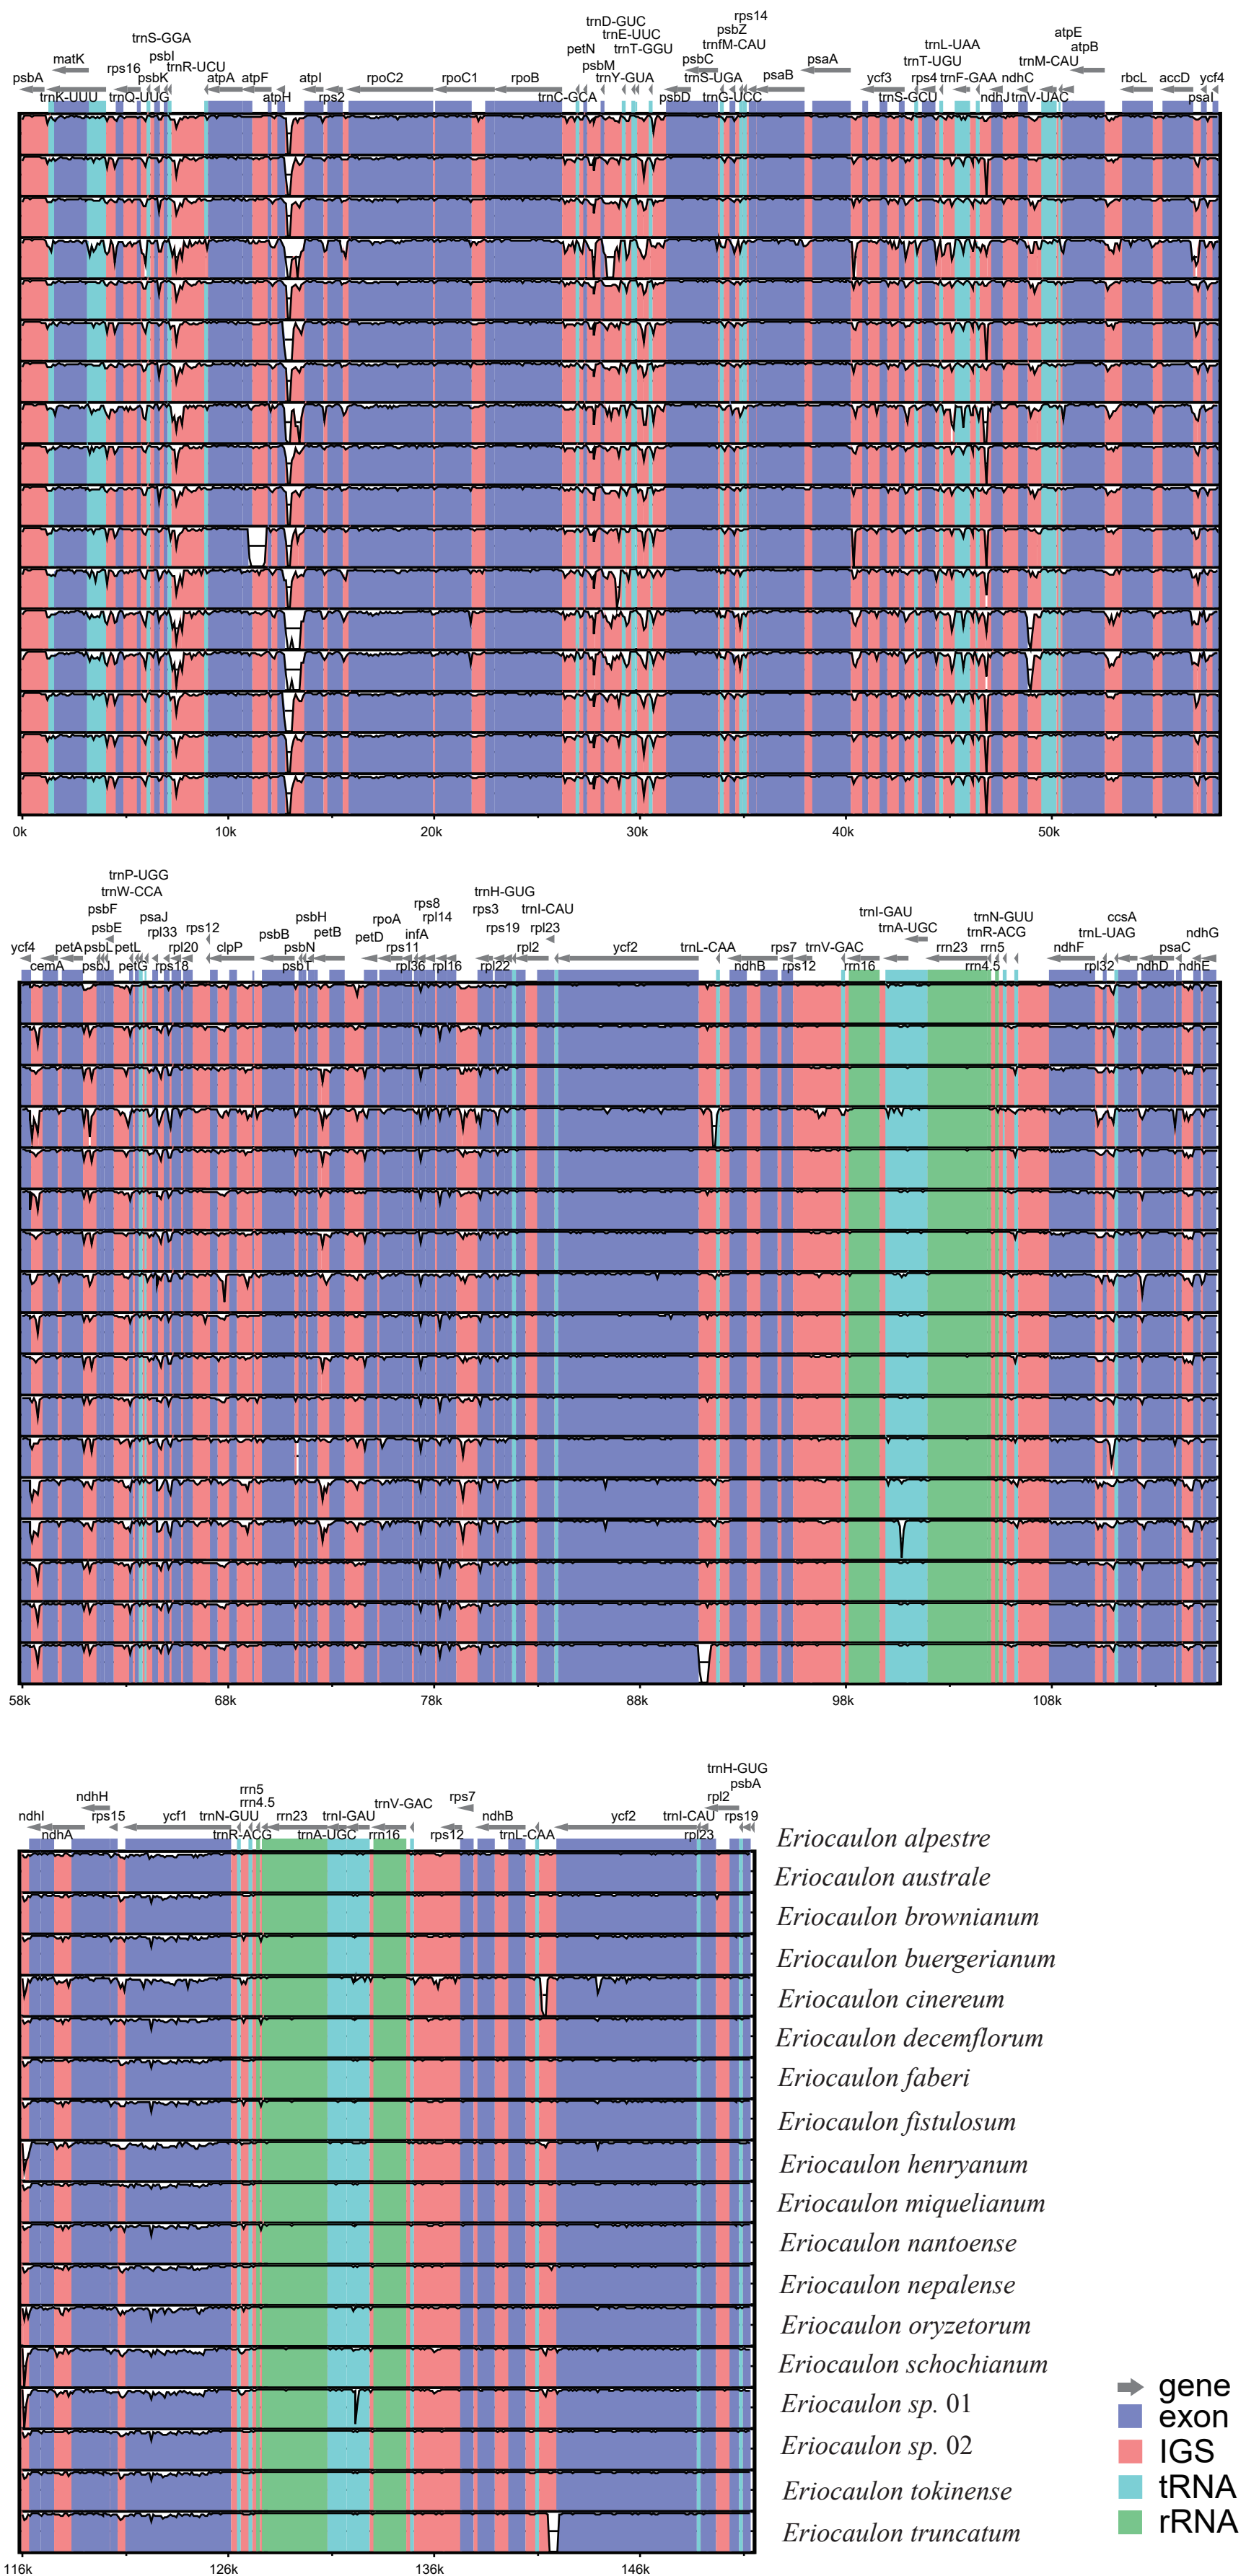

Figure S2. mVISTA-based sequence identity plot of 18 *Eriocaulon* species, using *E. alpestre* as a reference.
