# Supplementary material for: Insights into the phylogeny and chloroplast genome evolution of Eriocaulon (Eriocaulaceae)
Source: PubMed Central journal article supplement (PMC9840334; doi:10.1186/s12870-023-04034-z), 2023-01-14
Supplement: 12870_2023_4034_MOESM3_ESM.pdf [file 12870_2023_4034_MOESM3_ESM.pdf]

a. whole chloroplast genome dataset

b. 83 coding genes dataset

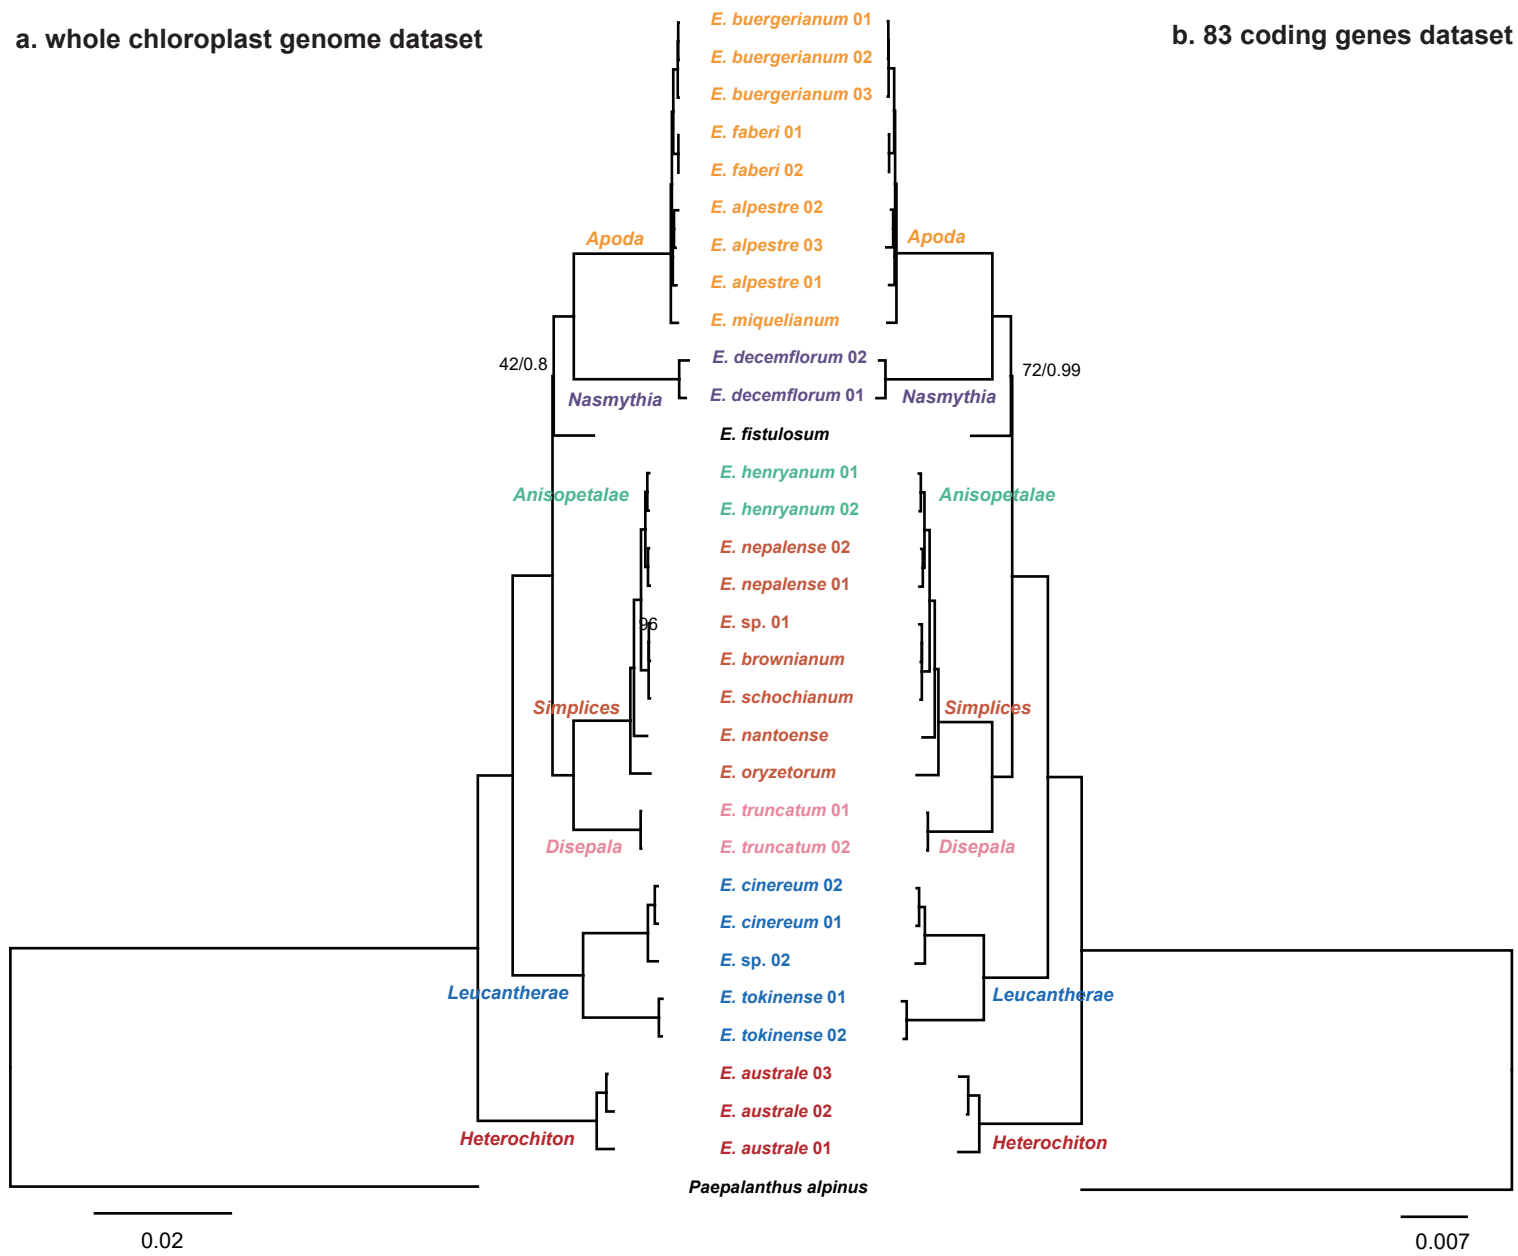

**Figure S3.** Phylogenetic trees of *Eriocaulon*. a. The whole chloroplast genome dataset. b. The 83-genes dataset. The number above the lines indicates the ML bootstrap values (BS) and BI posterior probability (PP). BS=100 and PP=1.0 are not shown.
